# Supplementary material for: Long-Term In Vitro Expansion of Epithelial Stem Cells Enabled by Pharmacological Inhibition of PAK1-ROCK-Myosin II and TGF-β Signaling
Source: PubMed Central journal article supplement — Cell Rep. Author manuscript; Available in PMC 2018 Dec 7. (PMC6284236; doi:10.1016/j.celrep.2018.09.072), 2018-10-16
Supplement: NIHMS1510941-supplement-1.pdf [file NIHMS1510941-supplement-1.pdf]

Cell Reports, Volume 25

## Supplemental Information

### Long-Term *In Vitro* Expansion of Epithelial Stem Cells Enabled by Pharmacological Inhibition of PAK1-ROCK-Myosin II and TGF- $\beta$ Signaling

Chengkang Zhang, Hyung Joo Lee, Anura Shrivastava, Ruipeng Wang, Travis J. McQuiston, Sharon S. Challberg, Brian A. Pollok, and Ting Wang

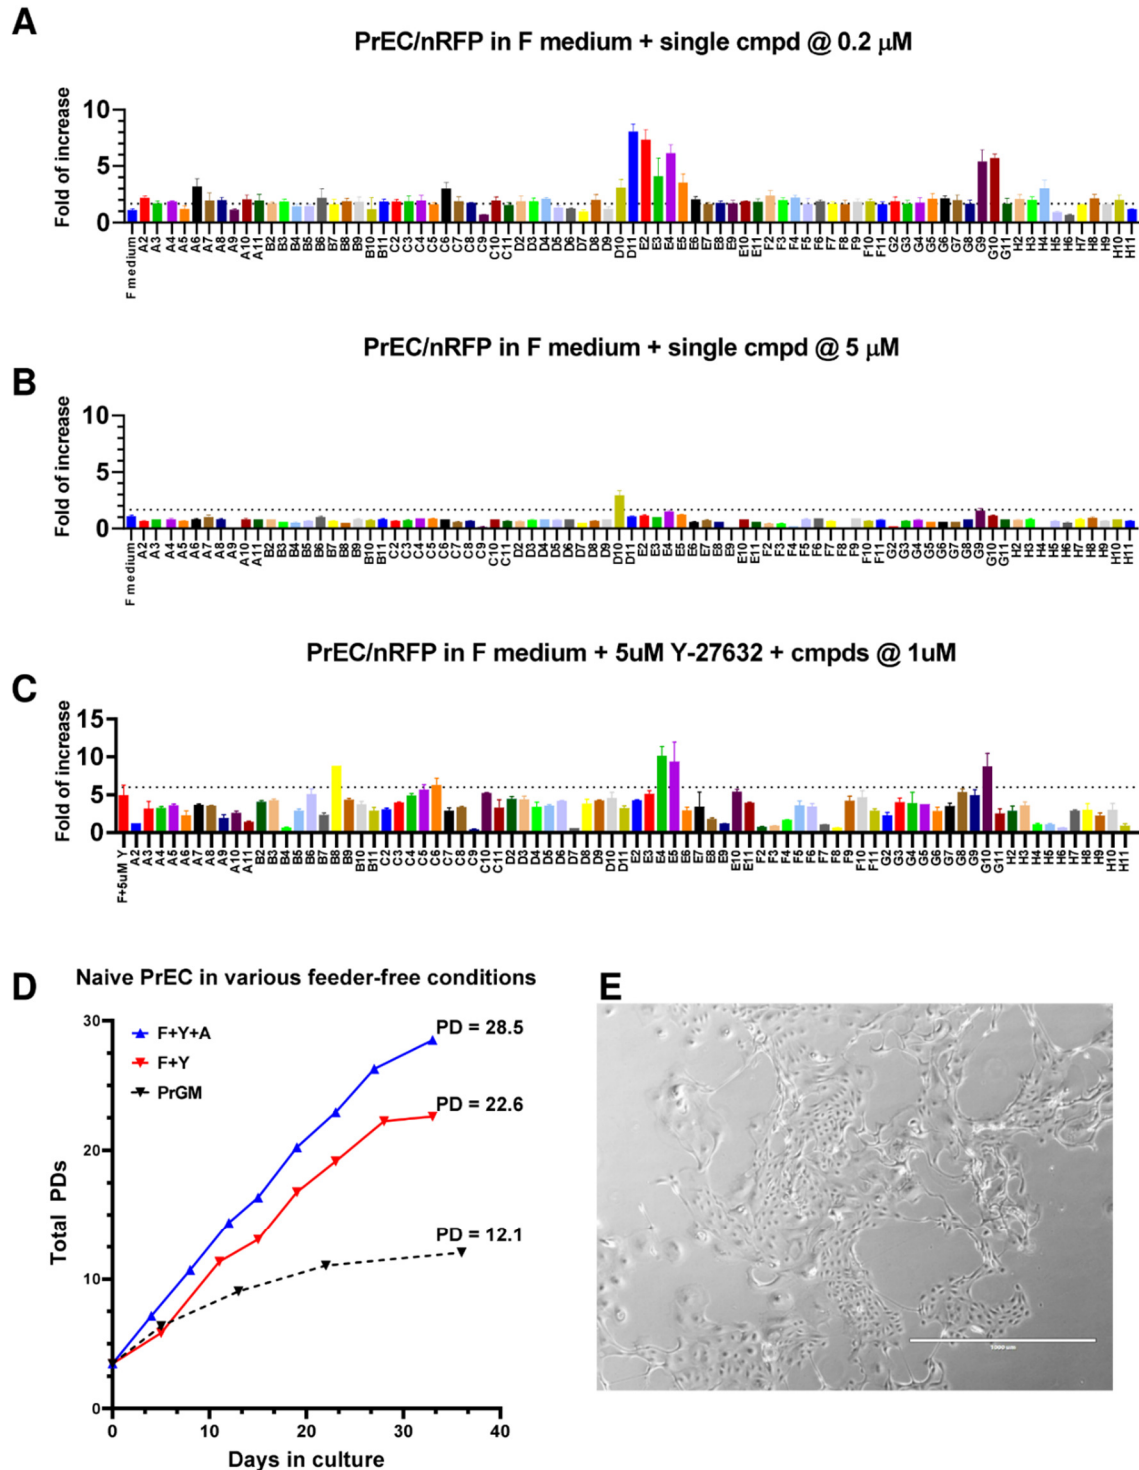

**Figure S1.**

**Figure S1:** TGF- $\beta$  and ROCK inhibition extended the proliferation of epithelial cells in the F medium. Related to Figure 1. **A-B.** Proliferation of PrEC/nRFP cells in the F medium supplemented with each small molecule at 0.2  $\mu$ M or 5  $\mu$ M in the absence of feeder cells (data are represented as mean  $\pm$  SD, n=3). **C.** Proliferation of PrEC/nRFP cells in the F medium supplemented with 5  $\mu$ M Y-27632 and each small molecule at 1  $\mu$ M (data are represented as mean  $\pm$  SD, n=3). **D.** Population doublings (PDs) of naive PrEC in PrGM (Lonza), F+Y (F medium supplemented

with 5  $\mu$ M Y-27632) and F+Y+A (F medium supplemented with 5  $\mu$ M Y-27632 and 1  $\mu$ M A83-01) in the absence of feeder cells. **E.** Prostate epithelial cells in F+Y+A (passage 8), most of the cells exhibited differentiated morphology.

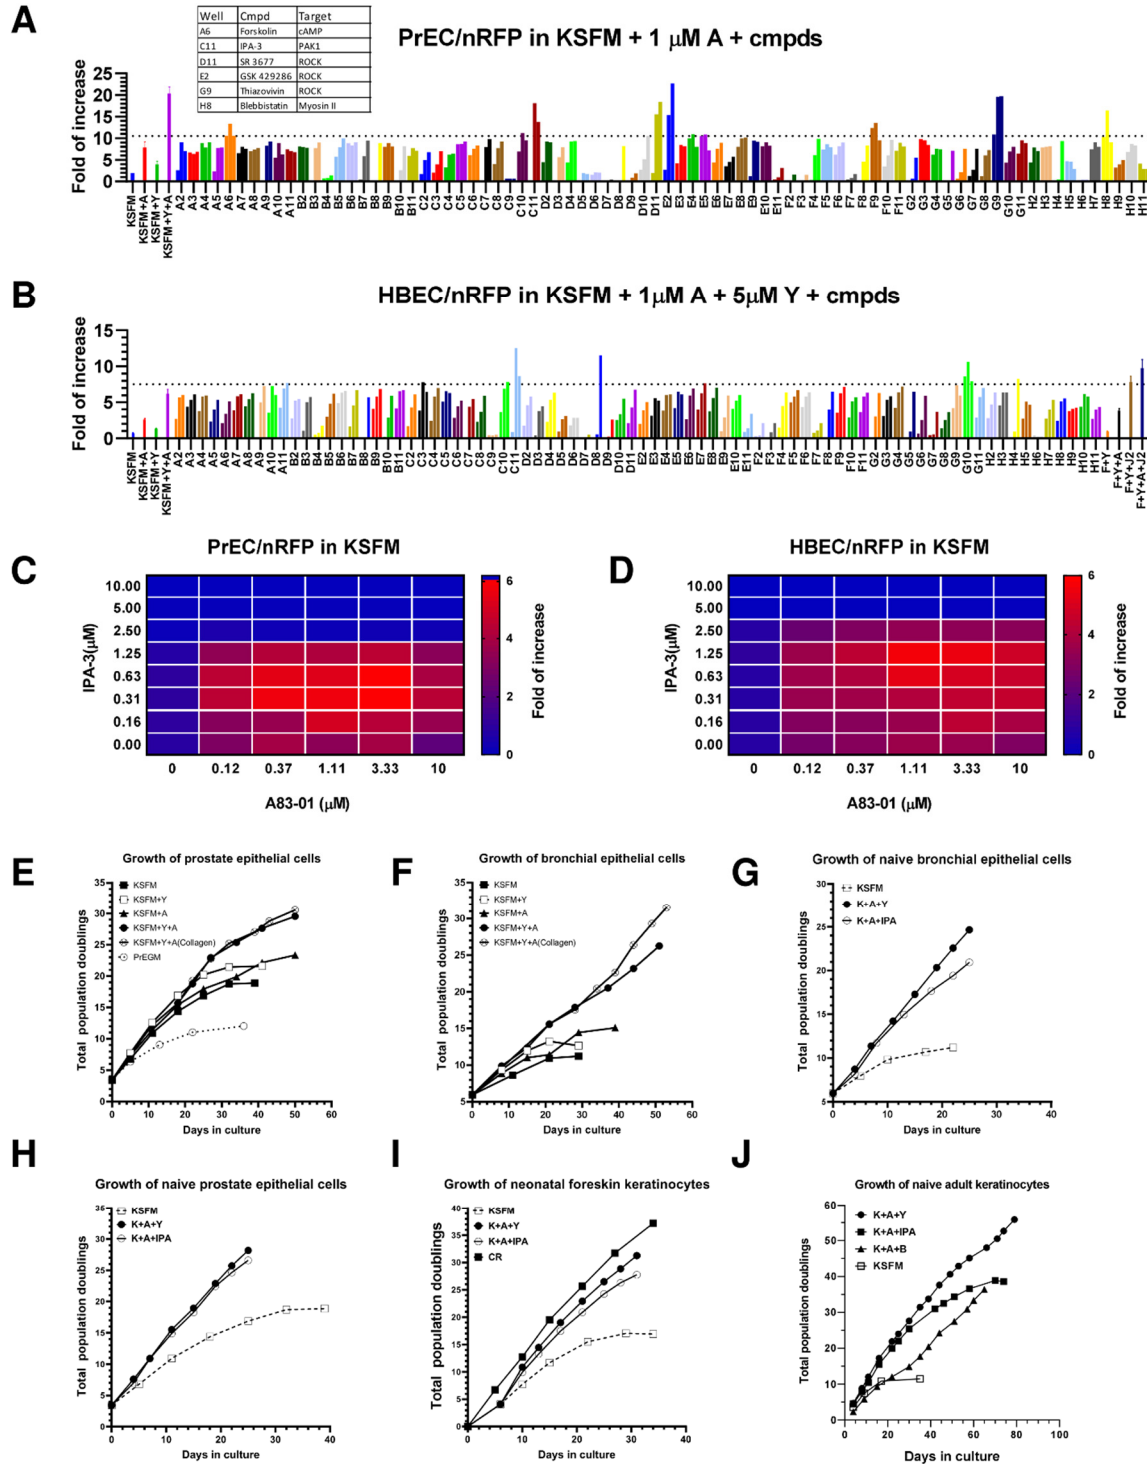

**Figure S2.**

**Figure S2:** TGF- $\beta$  and PAK1-ROCK-Myosin II inhibition extended the proliferation of epithelial cells in KSFM. Related to Figure 1. **A.** Proliferation of late-passage PrEC/nRFP cells in KSFM supplemented with 1  $\mu$ M A83-01 and each small molecule at 0.2  $\mu$ M, 1  $\mu$ M or 5  $\mu$ M (dose escalation from left to right, data are represented as mean  $\pm$  SD, n=3). **B.** Proliferation of late-passage HBEC/nRFP cells in KSFM supplemented with 1  $\mu$ M A83-01 and 5  $\mu$ M Y-27632 and each small molecule at 0.2  $\mu$ M, 1  $\mu$ M or 5  $\mu$ M (dose escalation from left to right, data are represented as mean  $\pm$  SD, n=3). **C-D.** Titration of A83-01 and IPA-3 on the growth of PrEC/nRFP or HBEC/nRFP cells in

KSFM (average of 4 replicates). **E-F.** Population doublings of PrEC or HBEC in PrGM (Lonza); KSFM; KSFM supplemented with 5  $\mu$ M Y-27632 (KSFM+Y); KSFM supplemented with 1  $\mu$ M A83-01 (KSFM+A); KSFM supplemented with 5  $\mu$ M Y-27632 and 1  $\mu$ M A83-01 on regular tissue culture vessel (KSFM+A+Y); or KSFM supplemented with 5  $\mu$ M Y-27632 and 1  $\mu$ M A83-01 on collagen I coated culture vessel (KSFM+A+Y(collagen)). **G-J.** Population doublings of naïve bronchial epithelial cells, prostate epithelial cells, foreskin keratinocytes and adult keratinocytes in different conditions. KSFM; K+Y+A, KSFM with 1  $\mu$ M A83-01 and 5  $\mu$ M Y-27632; K+A+IPA, KSFM with 1  $\mu$ M A83-01 and 0.2  $\mu$ M IPA-3; K+A+B, KSFM with 1  $\mu$ M A83-01 and 2  $\mu$ M blebbistatin; CR, conditional reprogramming method.

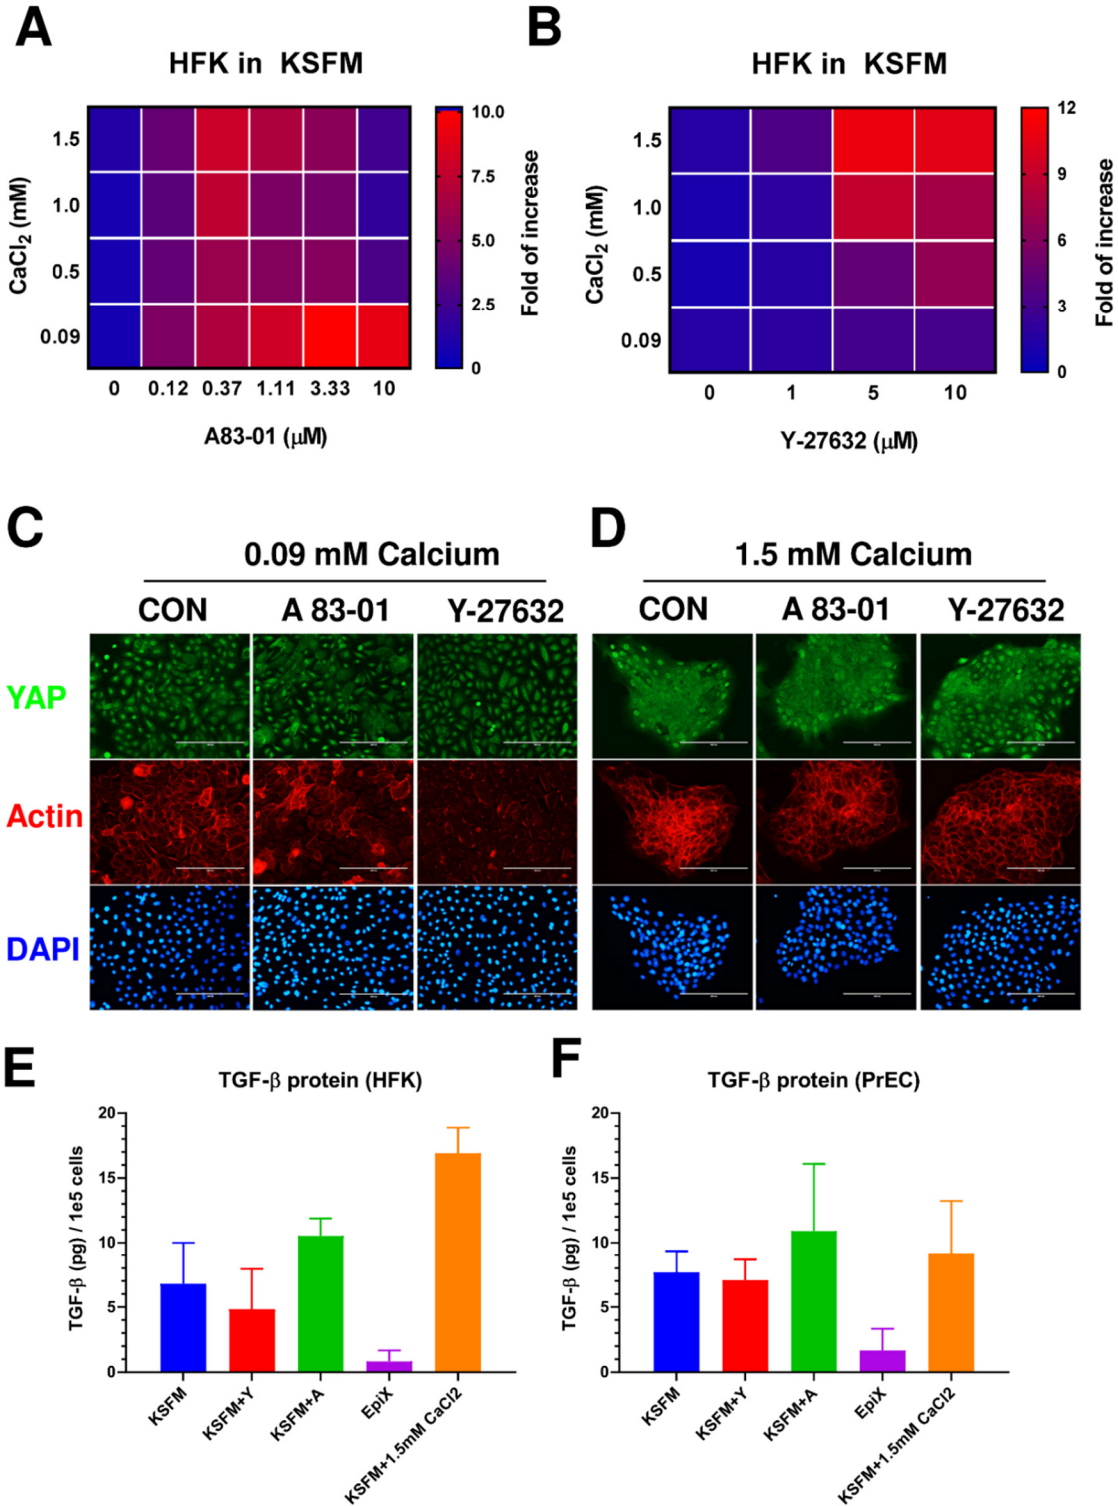

**Figure S3**

**Figure S3:** Nuclear translocation of YAP and reduced TGF- $\beta$  protein expression by the epithelial cells cultured in the EpiX medium. Related to Figure 1. **A.** Interaction between A83-01 and CaCl<sub>2</sub> on the proliferation of HFK cells in KSFM (average of 4 replicates). **B.** Interaction between Y-27632 and CaCl<sub>2</sub> on the proliferation of HFK cells in KSFM (average of 4 replicates). Elevated CaCl<sub>2</sub> concentration decreased the proliferation-promoting effect of A83-

01 but boosted the effect of Y-27632. **C, D.** Immunofluorescence staining of YAP using an antibody and actin cytoskeleton using Phalloidin in HFK cultured in KSFM (90  $\mu$ M CaCl<sub>2</sub>) or KSFM plus 1.5 mM CaCl<sub>2</sub>. **E-F.** Active TGF- $\beta$  expressed by HFK or PrEC cells cultured in KSFM, KSFM with 5  $\mu$ M Y-27632 (KSFM+Y), KSFM with 1  $\mu$ M A83-01 (KSFM+A), EpiX (KSFM + 1  $\mu$ M A83-01 + 5  $\mu$ M Y-27632 + 3  $\mu$ M Isoproterenol), or KSFM with 1.5 mM CaCl<sub>2</sub>. TGF- $\beta$  was expressed by HFK and PrEC in KSFM, and the TGF- $\beta$  protein level was greatly reduced in the EpiX medium (ELISA assay data are represented as mean  $\pm$  SD, n=3 replicates) .

**A**

| Cell Type | Donor Age | Culture Medium | PDs |
|-----------|-----------|----------------|-----|
| HFKN      | neonatal  | KSFM           | 17  |
|           |           | KSFM+A+Y       | 71  |
|           |           | KSFM+A+IPA     | 42  |
|           |           | KSFM+A+B       | 31  |
|           |           | KSFM+A+GSK     | 38  |
|           | neonatal  | KSFM+A+Y(*)    | 94  |
| HEKa      | adult     | KSFM           | 12  |
|           |           | KSFM+A+Y       | 56  |
|           |           | KSFM+A+B       | 39  |
|           |           | KSFM+A+GSK     | 36  |
| HMEC      | adult     | KSFM           | 12  |
|           |           | KSFM+A+Y       | 44  |
| PrEC      | adult     | KSFM           | 19  |
|           |           | PrGM           | 12  |
|           |           | KSFM+A         | 23  |
|           |           | KSFM+Y         | 22  |
|           |           | KSFM+A+Y       | 43  |
|           |           | KSFM+A+IPA     | 33  |
| HBEC      | adult     | KSFM           | 11  |
|           |           | KSFM+A         | 20  |
|           |           | KSFM+Y         | 19  |
|           |           | KSFM+A+Y       | 48  |
|           |           | KSFM+A+IPA     | 44  |
| DHBE-CF   | adult     | KSFM+A+Y       | 52  |

**B**

| Sample No. | Age/ Sex | Viable cells | Days to 50 million cells |
|------------|----------|--------------|--------------------------|
| CFNB02F    | 16/F     | 36,000       | 18 (P3)                  |
| CFNB03M    | 19/M     | 48,000       | 19 (P3)                  |
| CFNB04M    | 18/M     | 231,000*     | 19 (P3)                  |
| CFNB05M    | 15/M     | 36,000       | 22 (P3)                  |
| CFNB06M    | 18/M     | 59,500       | 20 (P3)                  |
| CFNB07F    | 20/F     | 400,000*     | 23 (P3)                  |
| CFNB08F    | 17/F     | 232,000*     | 25 (P4)                  |

\* The presence of blood cells might inflate total cell counts in these samples

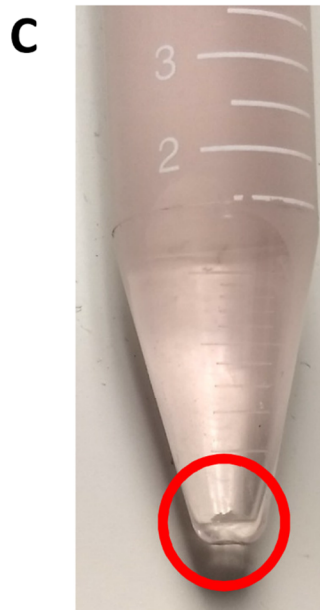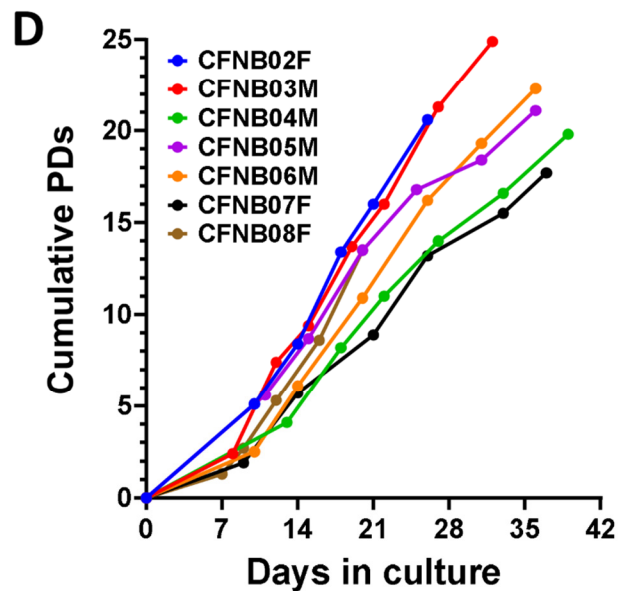

## Figure S4

**Figure S4:** Propagation of primary epithelial cells from various tissues in the EpiX medium. Related to Figure 1. **A.** Various epithelial cells generally reach <20 PDs in the media recommended by the suppliers. The same cells could be expanded for more than 40 PDs in the EpiX medium. \*, keratinocytes isolated in the EpiX medium reached more PDs than the ones purchased from commercial source. The cells are obtained from ThermoFisher (HFKN and HEKa) or Lonza (HMEC, PrEC, HBEC and DHBE-CF). HFKN, neonatal human foreskin keratinocyte. HEKa, adult human



epidermal keratinocyte. HMEC, human mammary epithelial cells (female). PrEC, human prostate epithelial cells. HBEC, human bronchial epithelial cells. DHBE-CF, diseased human bronchial epithelial cells from a cystic fibrosis patient. KSFM, Keratinocyte-SFM (ThermoFisher). PrGM, Prostate Epithelial Cell Growth Medium (Lonza). A, ALK5 inhibitor A83-01. Y, ROCK inhibitor Y-27632. B, Myosin II inhibitor blebbistatin. IPA, PAK1 inhibitor IPA-3. GSK, ROCK inhibitor GSK-429286. **B.** Expansion of primary nasal epithelial cells from nasal brushing samples obtained from 7 CF patients (all have homozygous  $\Delta F508$  mutations). More than 50 million nasal epithelial cells can be generated in 3–4 weeks. **C.** Nasal brushing samples collected from a CF patient. **D.** Expansion curves of 7 CF nasal epithelial cell strains in the EpiX medium over 5 weeks.

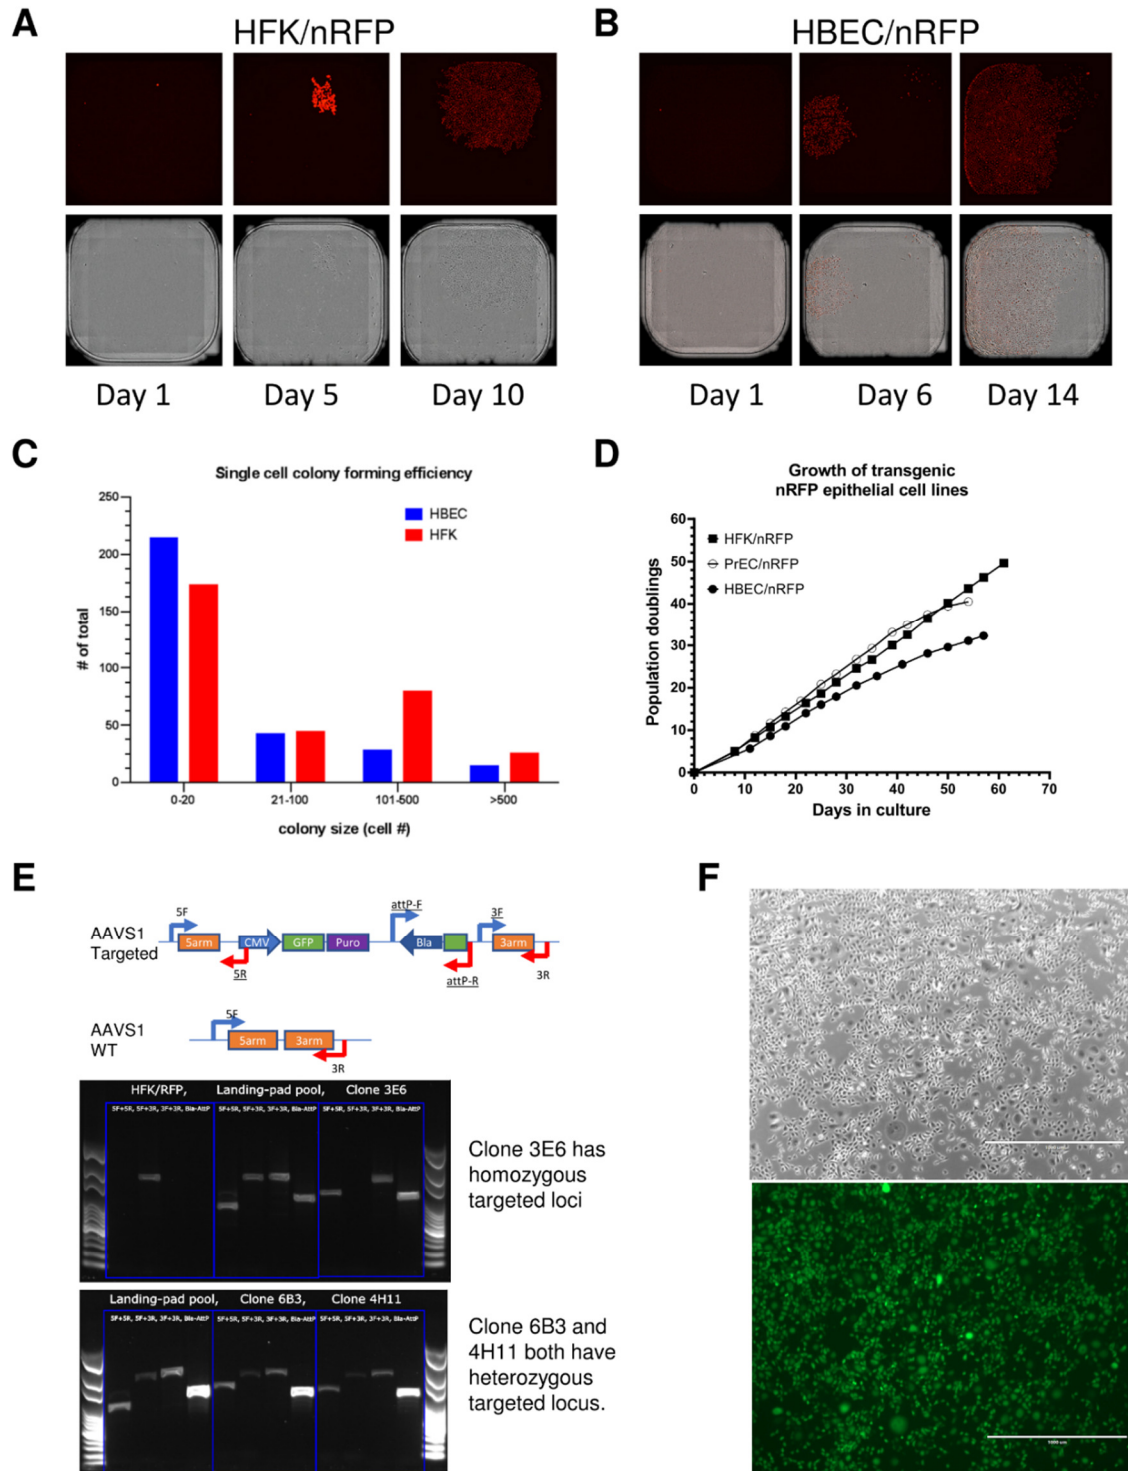

**Figure S5.**

**Figure S5:** EpiX medium supported single cell cloning and genetic engineering by CRISPR/Cas9. Related to Figure 1. **A. B.** Limited dilution of HFK/nRFP and HBEC/nRFP cell lines in 384-well plate. One cell grew up into a colony in about 2 weeks. **C.** Single cell cloning efficiency of HFK/nRFP and HBEC/nRFP cell lines in the EpiX medium. The number of cells in each colony were counted after 10 days. **D.** PrEC, HBEC and HFK were engineered to

express nRFP via lentivirus transduction and continued to expand for more than 30 PDs in the EpiX medium. **E.** Introducing a GFP-expression cassette into the AAVS1 locus of HFK by CRISRP/Cas9 RNP. Primers used to confirm the targeting events were depicted. Genomic DNA PCR were used to confirm the correct targeting of GFP-expression cassette into the AAVS1 locus. Both AAVS1 loci were targeted in Clone 3E6, and one locus was targeted in clones 6B3 and 4H11. **F.** Morphology of HFK expressing GFP from the AAVS1 locus (clone 6B3) under phase contrast and fluorescence microscopy.

**A**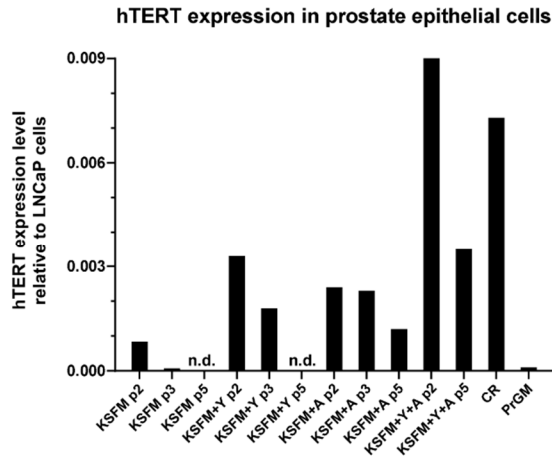**B**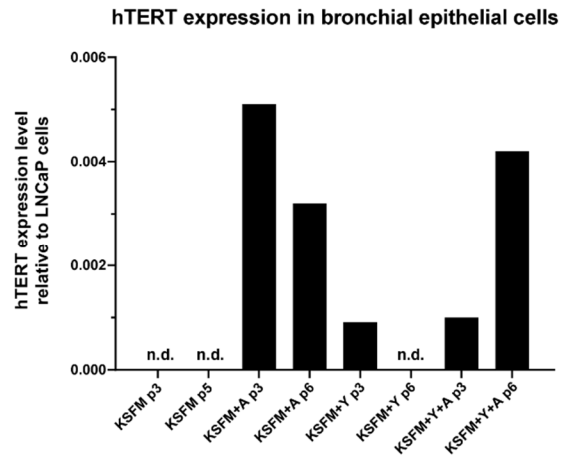**C**

| Gene Name | Description                                   | HFkn in KSFM |      | HFkn in EpiX |       |       |
|-----------|-----------------------------------------------|--------------|------|--------------|-------|-------|
|           |                                               | P2           | P6   | P2           | P13   | P23   |
| AKT1      | Protein Kinase B                              | 0.009        | 0.2  | 0.003        | 0.003 | 0.003 |
| ATM       | ATM Serine/Threonine Kinase                   | 0.007        | 0.04 | 0.002        | 0.004 | 0.002 |
| CDKN2A    | p16, INK4A                                    | 0.002        | 0.04 | 0.001        | 0.006 | 0.004 |
| GADD45A   | Growth arrest and DNA-damage-inducible, alpha | 0.01         | 0.07 | 0.002        | 0.003 | 0.008 |
| GLB1      | Galactosidase, beta 1                         | 0.004        | 0.02 | 0.005        | 0.004 | 0.005 |
| PLAU      | Plasminogen activator, urokinase              | 0.02         | 0.07 | 0.001        | 0.002 | 0.001 |
| SERPINE1  | Plasminogen activator inhibitor 1             | 0.04         | 0.1  | 0.002        | 0.002 | 0.003 |

**D**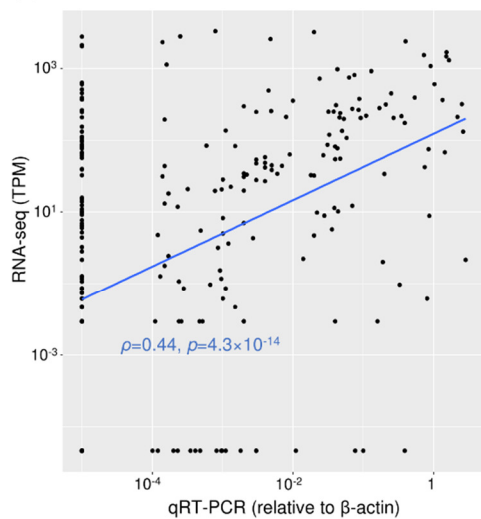**E**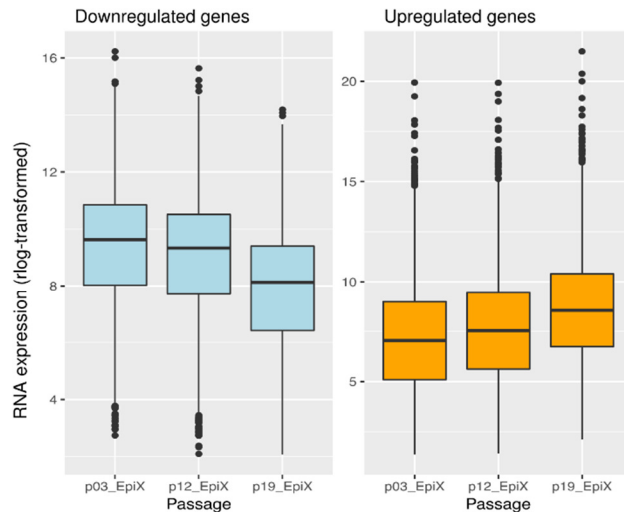

F

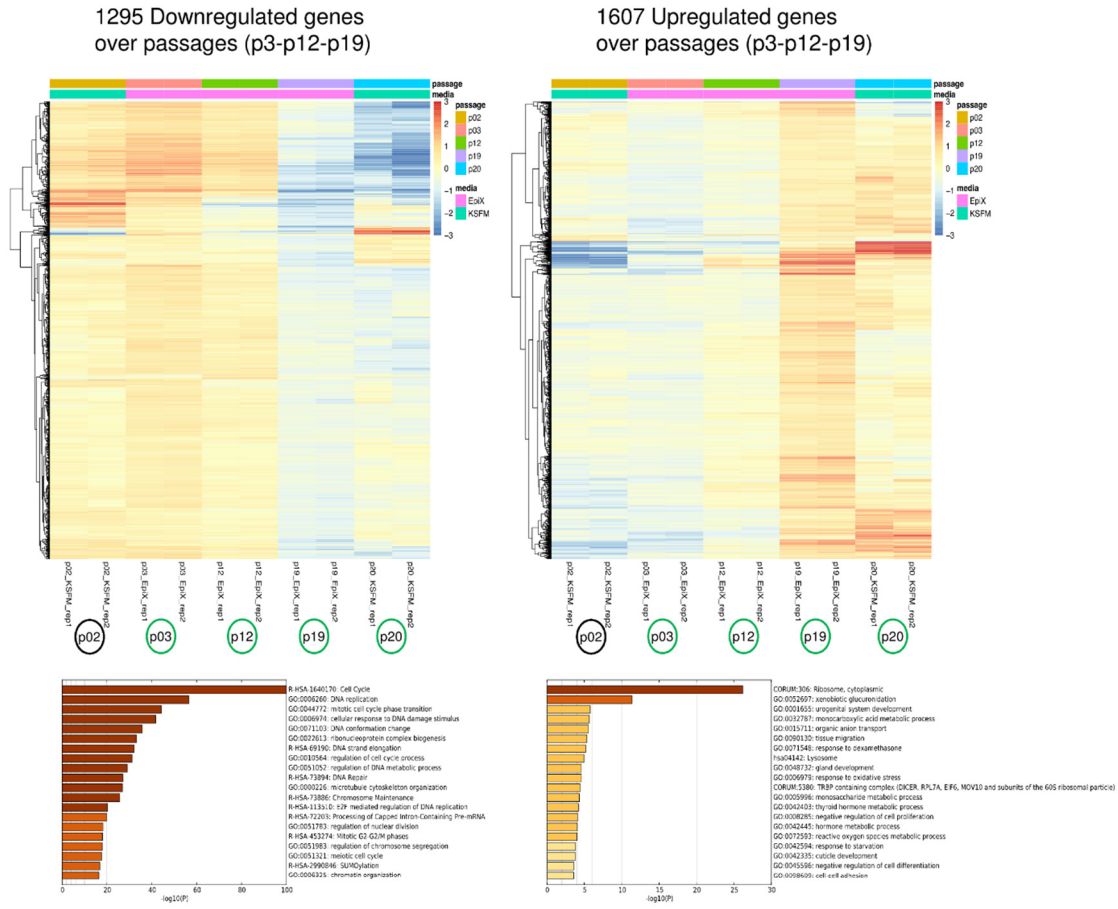

G

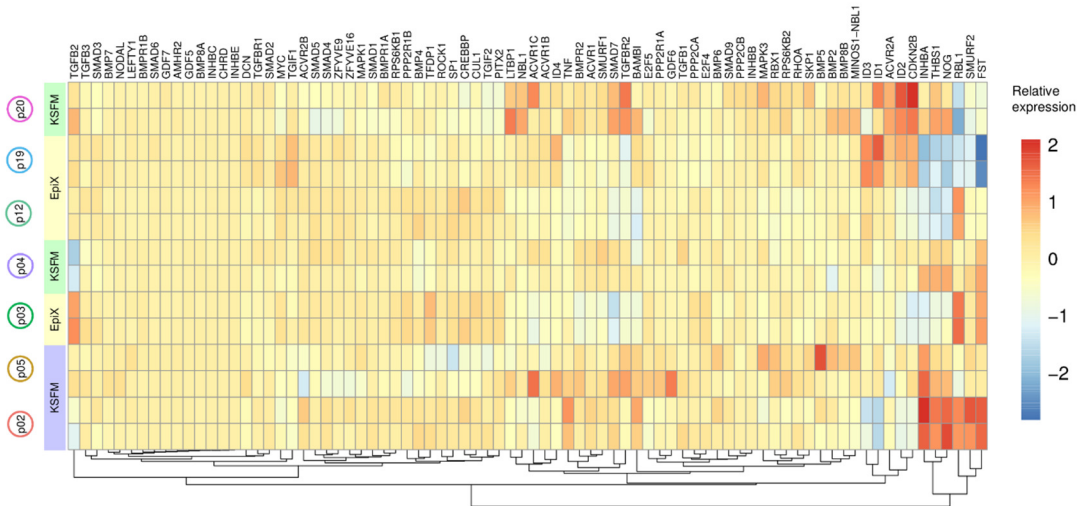

Figure S6.

**Figure S6:** Transcriptome dynamics of epithelial cells expanded in the EpiX medium. Related to Figure 2. **A, B.** qRT-PCR analysis of *TERT* expression in human prostate epithelial cells and bronchial epithelial cells cultured under different conditions. Prostate cancer cell line LNCaP was used as control for the expression of *TERT*, which was set as 1. n.d. not detected. **C.** qRT-PCR analysis of several stressed-related genes expression in HFK cultured in the EpiX medium or KFSM. The gene expression level was expressed as relative to that of  $\beta$ -actin, which was set as

1. **D.** Recapitulation of qRT<sup>2</sup> Profiler PCR Array results by RNA-Seq data. Each dot represented the expression of a gene in one matched condition. Each gene had five matched conditions: P2 in KSFM, P5 or P6 in KSFM, P2 or P3 in EpiX, P12 or P13 in EpiX, and P19 or P23 in EpiX. X-axis represented qRT-PCR expression value relative to the housekeeping gene  $\beta$ -actin expression level, which could be found in Table S2. Y-axis represented TPM value from RNA-Seq, which could be found in Table S2. Pseudocount  $10^{-5}$  was added to each value and log-transformed. Pearson correlation coefficient was calculated and shown with *p*-value. **E.** Gradual changes of gene expression in the increasing passages in the EpiX medium. The expression levels of differentially expressed genes in P12 passage was intermediate between P3 and P19 passages. Y-axis represented rlog-transformed read counts. **F.** The heatmap of the expression levels of differentially expressed genes over increased passages in EpiX medium and gene ontology and pathway enrichment analysis of downregulated and upregulated genes by metascape tool. **G.** Heatmap of the expression levels of genes in KEGG human TGF- $\beta$  signaling pathway among different culture conditions.

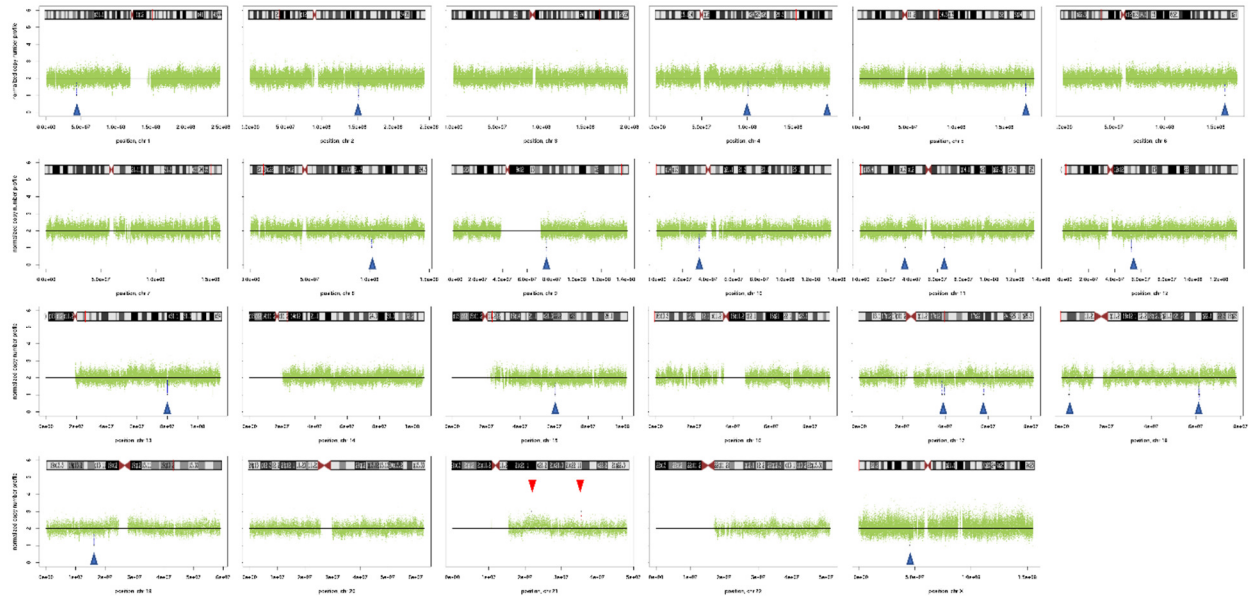

**Figure S7.**

**Figure S7:** Locations of copy number variations (CNV) that were identified the CF sample by whole genome sequencing. Related to Figure 3 and Table S4. Blue triangles indicated the locations of losses in CNV, and red triangles indicate the locations of gains in CNV.

## HFK/Luc in NSG mice

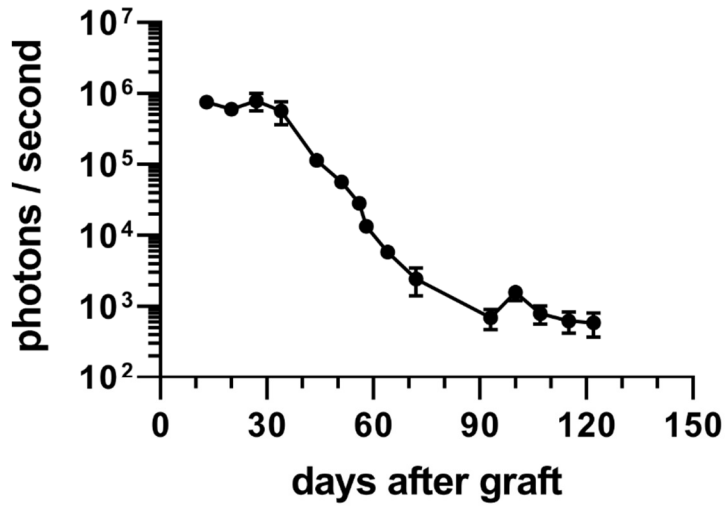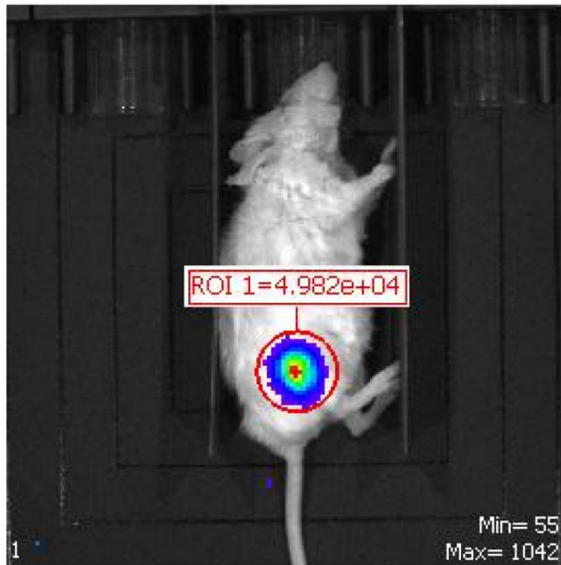

Day122 after grafting

### Figure S8.

**Figure S8:** *in vivo* luminescence imaging of HFK expressing firefly luciferase (HFK/Luc) that were injected subcutaneously into NSG mice. Related to Figure 4. Luminescence signal was readily detected 122 days after the HFK cells were injected into the NSG mouse, suggesting that EpiX-expanded HFK retained self-renewal ability *in vivo*.



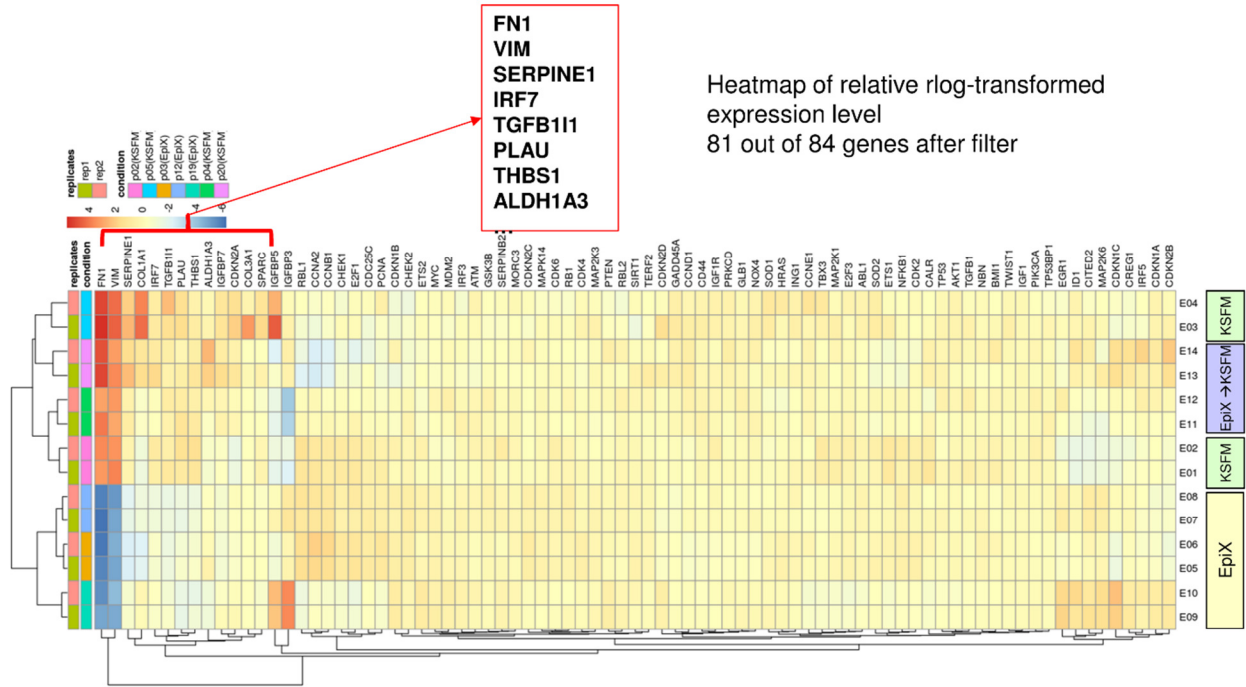

**Figure S9.**

**Figure S9:** Heat-map of gene expressions associated with cellular senescence (genes included in the RT<sup>2</sup> Profiler™ PCR Array). Related to Figures 2 and 6.

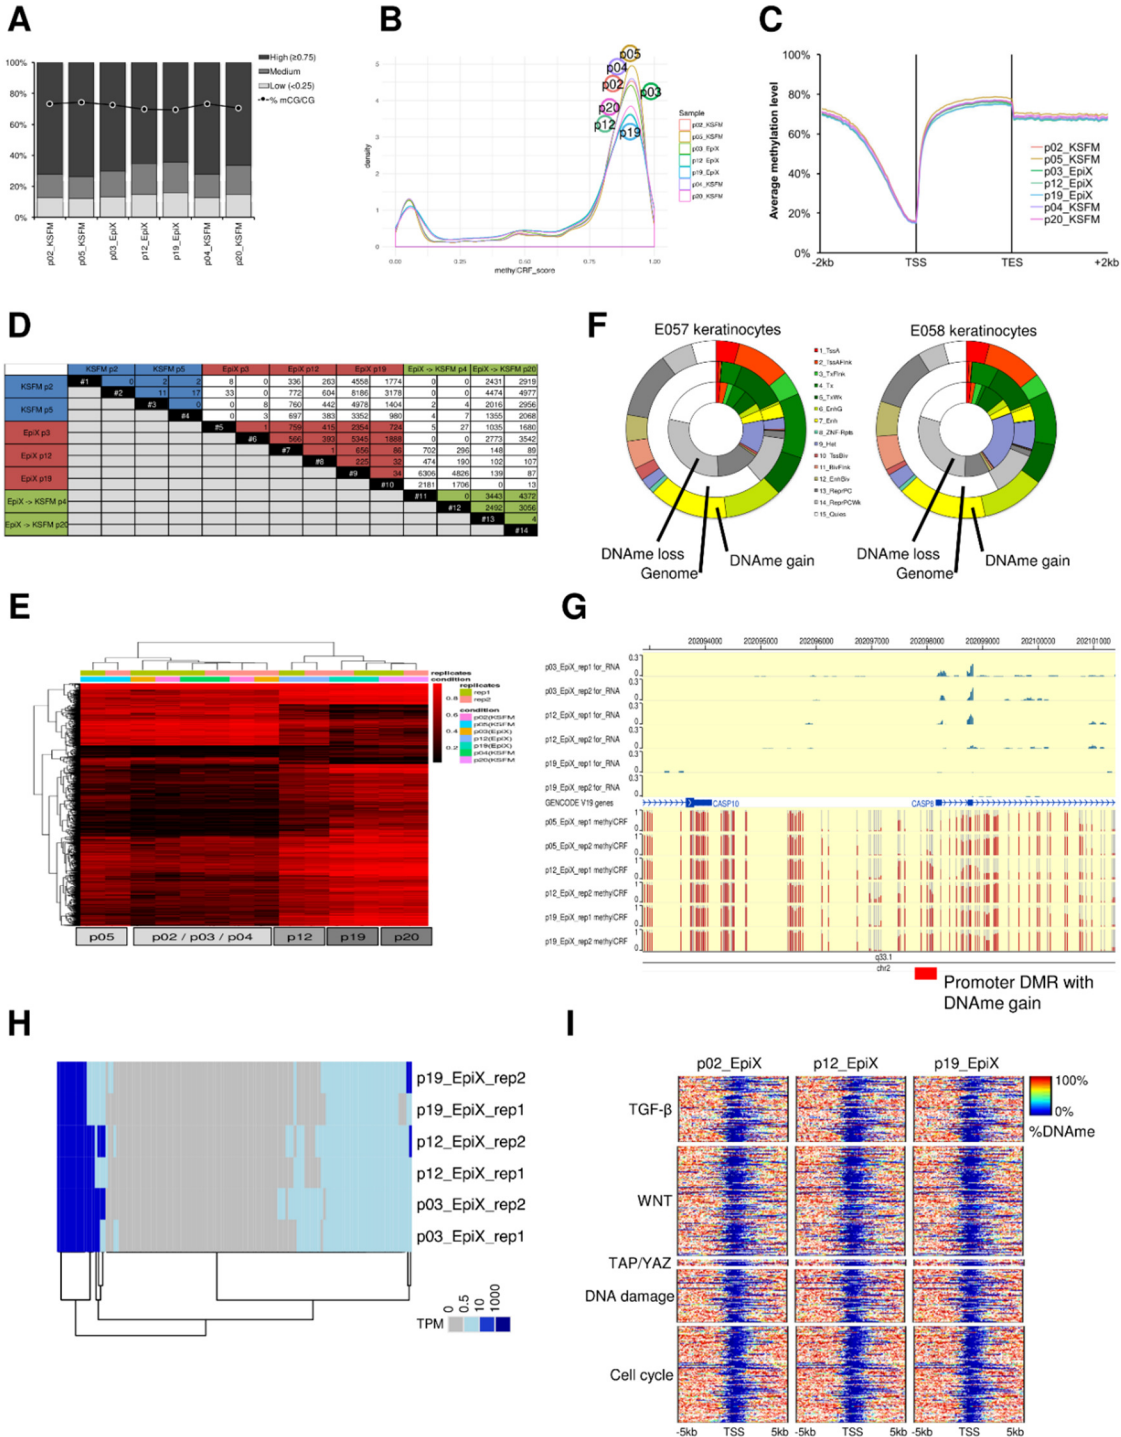

**Figure S10.**

**Figure S10:** DNA methylation changes of HFK expanded in the EpiX medium. Related to Figure 6. **A.** The average DNA methylation levels of all CpGs estimated by methylCRF (line plot) and the percentage of CpGs with high, medium, and low methylation levels (bar plot). **B.** The methylation level distribution of all CpGs. The CpG methylation levels showed bimodal distribution with two peaks of low (0-10%) and high (80-100%) methylation levels. **C.** The average DNA methylation levels over genic and 2kb neighboring regions. TTS, transcription start site. TES, transcription end site. **D.** Number of DMRs identified in all pair-wise comparisons. **E.** The heatmap of

DNA methylation levels of all 2419 DMRs across passages. **F.** The chromatin states of DMRs using chromHMM 15 core states in two keratinocytes (E057 and E058). **G.** The epigenome browser view of DMRs located on the promoter of the gene *CASP8*. The gene expression level was downregulated as the promoter gained DNA methylation level across passages. **H.** The heatmap of expression levels of genes with promoter methylation changes. Gene expression levels were considered as not detected (grey, TPM < 0.5), low (light blue, TPM of 0.5 to 10), medium (blue, TPM of 10 to 1000), or high (dark blue, TPM  $\geq$  1000) according to its TPM value. **I.** The heatmap of DNA methylation levels of promoters and its 5kb-neighboring regions of various pathway related genes. TSS, transcription start site.

**Table S7:** Prediction of cumulative population doublings. Related to Figure 6.

| CpG site         | 1                    | 2                        | 3                      | 3                      | 4                       | 5                       | 6                       | Actual<br>cPDs | Predicted<br>cPDs |  |  |
|------------------|----------------------|--------------------------|------------------------|------------------------|-------------------------|-------------------------|-------------------------|----------------|-------------------|--|--|
| ID               | cg02332525           | cg17453778               | cg03891191             | cg03891191             | cg01459453              | cg01999333              | cg16431978              |                |                   |  |  |
| Associated gene  | GRM7                 | CASR                     | PRAMEF2                | PRAMEF13               | SELP                    | CASP14                  | KRTAP13-3               |                |                   |  |  |
| hg19 coordinates | chr3:6903152-6903154 | chr3:121902560-121902562 | chr1:12916997-12916999 | chr1:13452581-13452583 | chr1:16959211-169599213 | chr19:15162622-15162624 | chr21:31797931-31797933 |                |                   |  |  |
| p02_KSFM_rep1    | 0.04                 | 0.05                     | 0.86                   | 0.32                   | 0.90                    | 0.90                    | 0.83                    | 7.5            | 0.0               |  |  |
| p02_KSFM_rep2    | 0.04                 | 0.04                     | 0.90                   | 0.32                   | 0.90                    | 0.90                    | 0.79                    |                | -1.0              |  |  |
| p05_KSFM_rep1    | 0.04                 | 0.04                     | 0.84                   | 0.32                   | 0.90                    | 0.84                    | 0.83                    | 17.6           | 1.6               |  |  |
| p05_KSFM_rep2    | 0.04                 | 0.04                     | 0.86                   | 0.32                   | 0.90                    | 0.77                    | 0.83                    |                | 2.8               |  |  |
| p03_EpiX_rep1    | 0.04                 | 0.04                     | 0.86                   | 0.32                   | 0.87                    | 0.85                    | 0.83                    | 14.2           | 0.4               |  |  |
| p03_EpiX_rep2    | 0.04                 | 0.04                     | 0.86                   | 0.32                   | 0.87                    | 0.84                    | 0.83                    |                | 0.7               |  |  |
| p12_EpiX_rep1    | 0.04                 | 0.04                     | 0.86                   | 0.32                   | 0.85                    | 0.84                    | 0.79                    | 45.7           | 0.8               |  |  |
| p12_EpiX_rep2    | 0.04                 | 0.04                     | 0.86                   | 0.32                   | 0.90                    | 0.44                    | 0.83                    |                | 10.7              |  |  |
| p19_EpiX_rep1    | 0.04                 | 0.04                     | 0.87                   | 0.32                   | 0.88                    | 0.08                    | 0.46                    | 73.0           | 22.6              |  |  |
| p19_EpiX_rep2    | 0.04                 | 0.04                     | 0.84                   | 0.32                   | 0.88                    | 0.08                    | 0.43                    |                | 23.7              |  |  |
| p04_KSFM_rep1    | 0.04                 | 0.04                     | 0.90                   | 0.32                   | 0.88                    | 0.49                    | 0.85                    | 15.6           | 7.9               |  |  |
| p04_KSFM_rep2    | 0.04                 | 0.04                     | 0.86                   | 0.32                   | 0.88                    | 0.08                    | 0.83                    |                | 19.0              |  |  |
| p20_KSFM_rep1    | 0.04                 | 0.05                     | 0.86                   | 0.32                   | 0.88                    | 0.08                    | 0.46                    | 71.3           | 23.1              |  |  |
| p20_KSFM_rep2    | 0.04                 | 0.04                     | 0.84                   | 0.32                   | 0.88                    | 0.08                    | 0.83                    |                | 19.5              |  |  |
| E057_methylCRF   | 0.04                 | 0.04                     | 0.91                   | 0.33                   | 0.90                    | 0.90                    | 0.92                    |                | -2.9              |  |  |
| E058_methylCRF   | 0.04                 | 0.04                     | 0.60                   | 0.33                   | 0.90                    | 0.90                    | 0.92                    |                | 5.4               |  |  |
| E058_WG BS       | 0.00                 | 0.00                     | 0.43                   | ND                     | 0.87                    | 1.00                    | 0.95                    |                | 2.0               |  |  |
